# Supplementary material for: How and why kinetics, thermodynamics, and chemistry induce the logic of biological evolution
Source: publisher site journal article supplement (doi:10.3762/bjoc.13.66), 2017-04-07
Supplement: Additional file 1 [file 1860-5397-13-66-S1.pdf]

# Supporting Information

for

## How and why kinetics, thermodynamics, and chemistry induce the logic of biological evolution

Addy Pross<sup>1,2</sup> and Robert Pascal<sup>\*3</sup>

Address: <sup>1</sup>Department of Chemistry, Ben Gurion University of the Negev, Be'er Sheva 84105, Israel, <sup>2</sup> NYU Shanghai, 1555 Century Avenue, Pudong New Area, Shanghai, 200122 China, and <sup>3</sup>Institut des Biomolécules Max Mousseron, UMR5247 CNRS-University of Montpellier-ENSCM, CC17006, Place E. Bataillon, Montpellier F-34095, France

Email: Robert Pascal - robert.pascal@umontpellier.fr

\*Corresponding author

**Conditions for exponential growth and steady states calculated  
for the system of Figure 3**

### (1) In the absence of autocatalyst A:

When the system reaches a steady state:

$$d[R]/dt = k_0 - k_1 [R]^*_{1} = 0$$

The steady state concentration of [R] can be assessed as:

$$[R]^*_{1} = k_0 / k_1$$

### (2) Autocatalyst A present:

Condition for growth of A:

$$d[A]/dt = k_2 [A] [R] - k_3 [A] > 0$$

The observation of an autocatalytic behaviour from A therefore requires the condition

$$k_2 [R] > k_3$$

The determination of steady states for R and A requires considering the following equations:

$$d[R]/dt = k_0 - k_2 [A]^*_{2} [R]^*_{2} - k_1 [R]^*_{2} = 0$$

and

$$d[A]/dt = k_2 [A]^*_{2} [R]^*_{2} - k_3 [A]^*_{2} = 0$$

Then either  $[A]^*_{2} = 0$

or  $[R]^*_{2} = k_3 / k_2$

and  $k_0 - k_3 \times [A]^*_{2} - k_1 \times k_3 / k_2 = 0$  and then  $[A]^*_{2} = (k_0 - k_1 \times k_3 / k_2) / k_3$

### (3) Autocatalyst A and parasite B present:

Condition for growth of B:

$$d[B]/dt = k_4 [A] [B] - k_5 [B] > 0$$

so that  $k_4 [A] > k_5$

Steady states:

$$d[R]/dt = k_0 - k_2 [A]^*_{3} [R]^*_{3} - k_1 [R]^*_{3} = 0$$

$$d[A]/dt = k_2 [A]^*_{3} [R]^*_{3} - k_3 [A]^*_{3} - k_4 [B]^*_{3} [A]^*_{3} = 0$$

$$d[B]/dt = k_4 [A]^*_{3} [B]^*_{3} - k_5 [B]^*_{3} = 0$$

Which leads to either  $[B]^*_{3} = 0$ ,

or  $[A]^*_{3} = k_5 / k_4$  and  $[R]^*_{3} = k_0 / (k_1 + k_2 k_5 / k_4)$
